# Supplementary material for: First principles investigation of anionic redox in bisulfate lithium battery cathodes
Source: Royal Society of Chemistry journal article supplement (doi:10.1039/d2cp00473a), 2022-01-01
Supplement: d2cp00473a1.pdf [file d2cp00473a1.pdf]

## Supporting Information

### First principles investigation of anionic redox in bisulfate lithium battery cathodes

*Pawan Kumar Jha,† Shashwat Singh,† Mayank Srivastava,<sup>§</sup> Prabeer Barpanda† and Gopalakrishnan Sai Gautam\*‡*

† Faraday Materials Laboratory (FaMaL), Materials Research Centre, Indian Institute of Science, Bangalore 560012, India

<sup>§</sup> Department of Electronic Systems Engineering, Indian Institute of Science, Bangalore 560012, India

‡ Department of Materials Engineering, Indian Institute of Science, Bangalore 560012, India

#### Corresponding Author

\* E-mail: [saigautamg@iisc.ac.in](mailto:saigautamg@iisc.ac.in)

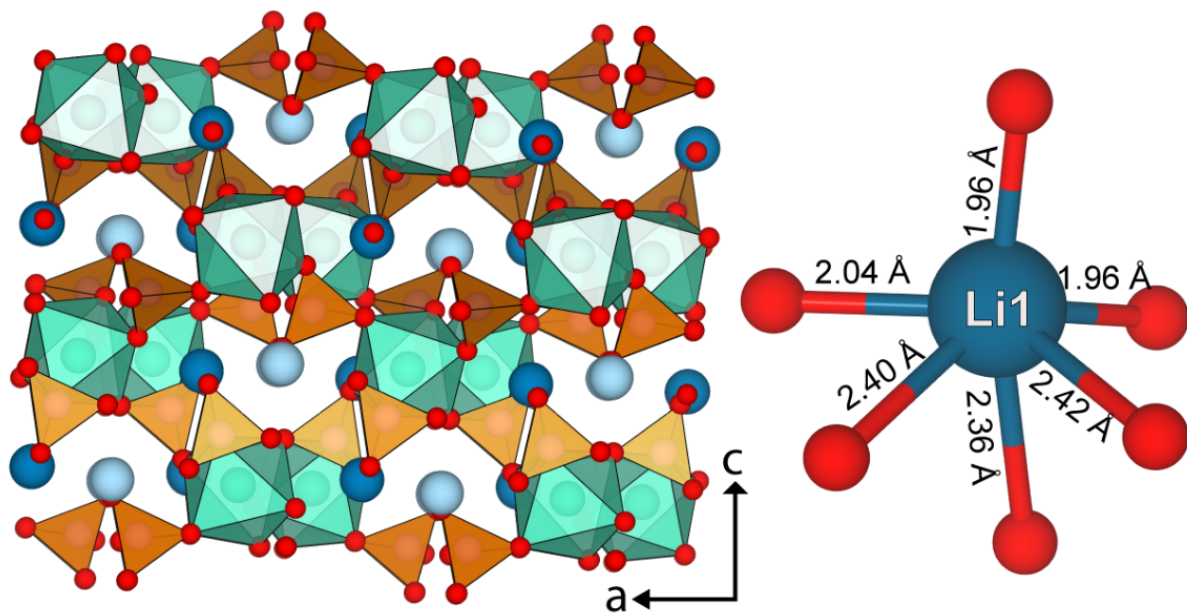

**Figure S1.** Crystal framework of orthorhombic (o)- $\text{Li}_2\text{M}(\text{SO}_4)_2$  along  $b$  direction. Dark and light blue spheres represent Li1 and Li2 sites. Orange and cyan polyhedra indicate the  $\text{SO}_4$  tetrahedra and  $\text{MO}_6$  octahedra. Right panel represents the distortion in  $\text{LiO}_6$  octahedra of Li1 sites.

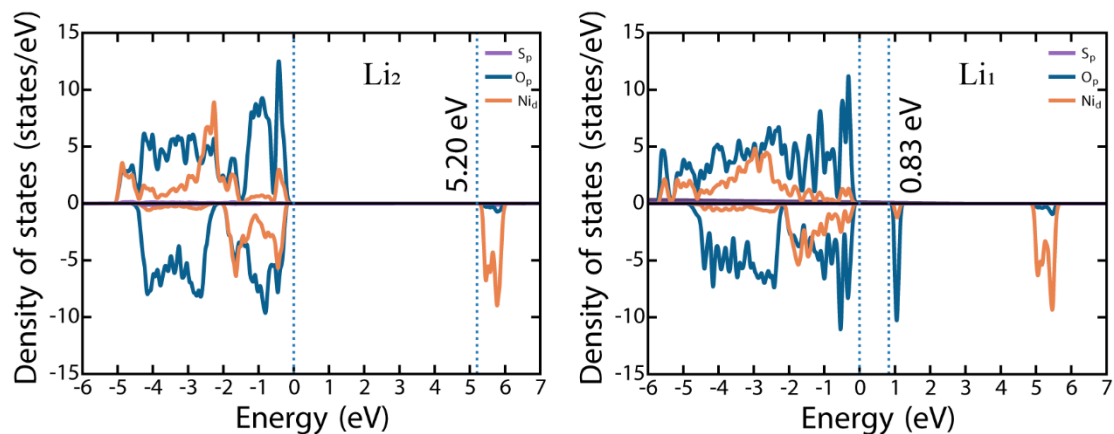

**Figure S2.** Hybrid functional calculated projected density of states (pDOS) for monoclinic (m)- $\text{Li}_2\text{Ni}(\text{SO}_4)_2$  and  $\text{LiNi}(\text{SO}_4)_2$  in left and right panel respectively. Purple, blue, and orange curves represent  $S_p$ ,  $O_p$ , and  $\text{Ni } d$  states respectively. Dotted blue lines indicate the valence and conduction band edges, with the numbers indicating band gap values.

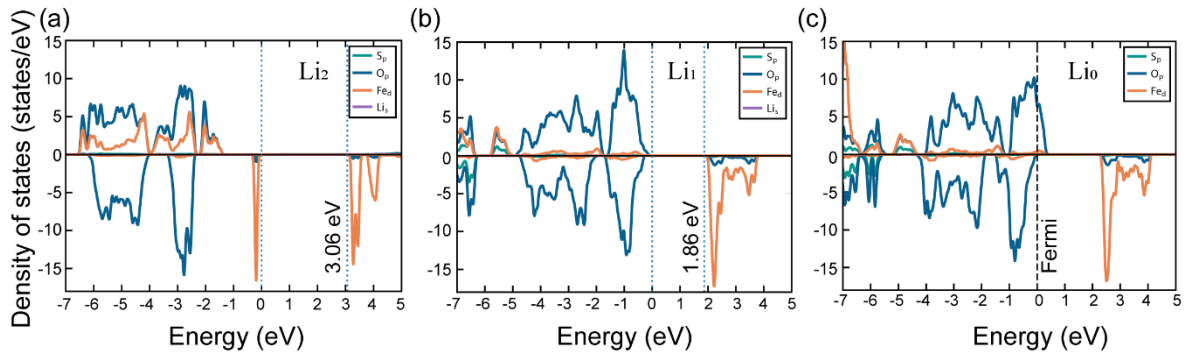

**Figure S3.** Projected density of state (pDOS) for monoclinic  $m\text{-Li}_x\text{Fe}(\text{SO}_4)_2$  at different states of (de)lithiation, namely  $x = 2, 1,$  and  $0,$  as calculated by the Hubbard  $U$  corrected strongly constrained and appropriately normed (SCAN+ $U$ ) functional. Cyan, blue, orange, and purple curves correspond to  $S p, O p, Fe d,$  and  $Li s$  states respectively. Dotted blue lines represent the valence and conduction band edges, while dashed black line indicates the Fermi level. Band gaps are indicated by the text notations at the corresponding conduction band minima.

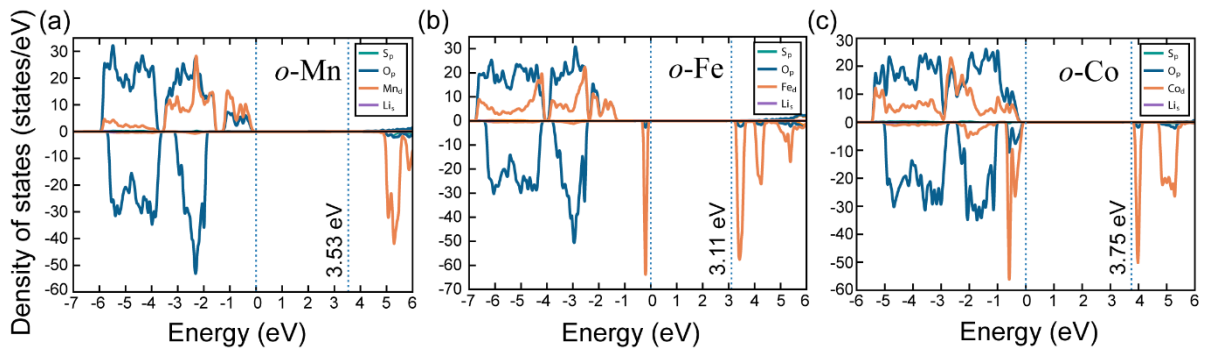

**Figure S4.** SCAN+ $U$ -calculated pDOS for  $o\text{-Li}_2\text{M}(\text{SO}_4)_2,$  where  $M = \text{Mn}, \text{Fe}$  and  $\text{Co}$  in panels a, b, and c, respectively. Notations on each panel are identical to **Figure S3.**

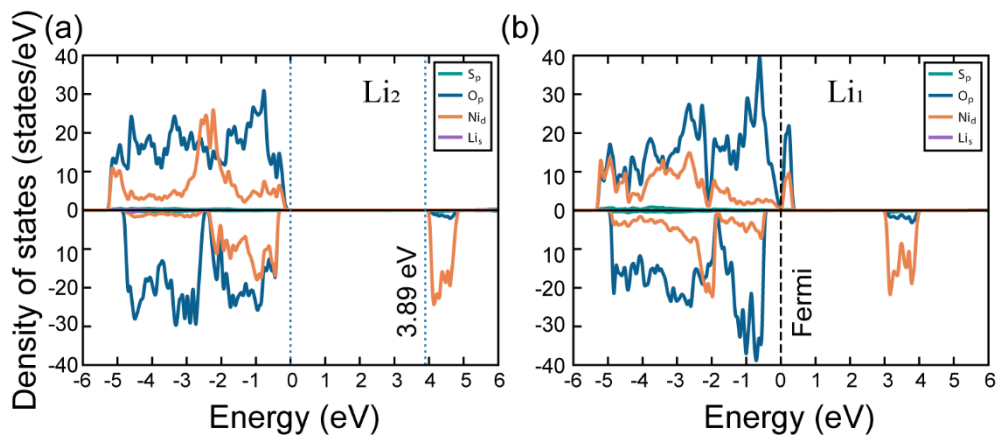

**Figure S5.** SCAN+ $U$ -calculated pDOS of  $o\text{-Li}_x\text{Ni}(\text{SO}_4)_2$  for  $x = 2$  (panel a) and  $1$  (panel b). Notations on each panel are identical **Figure S3.**

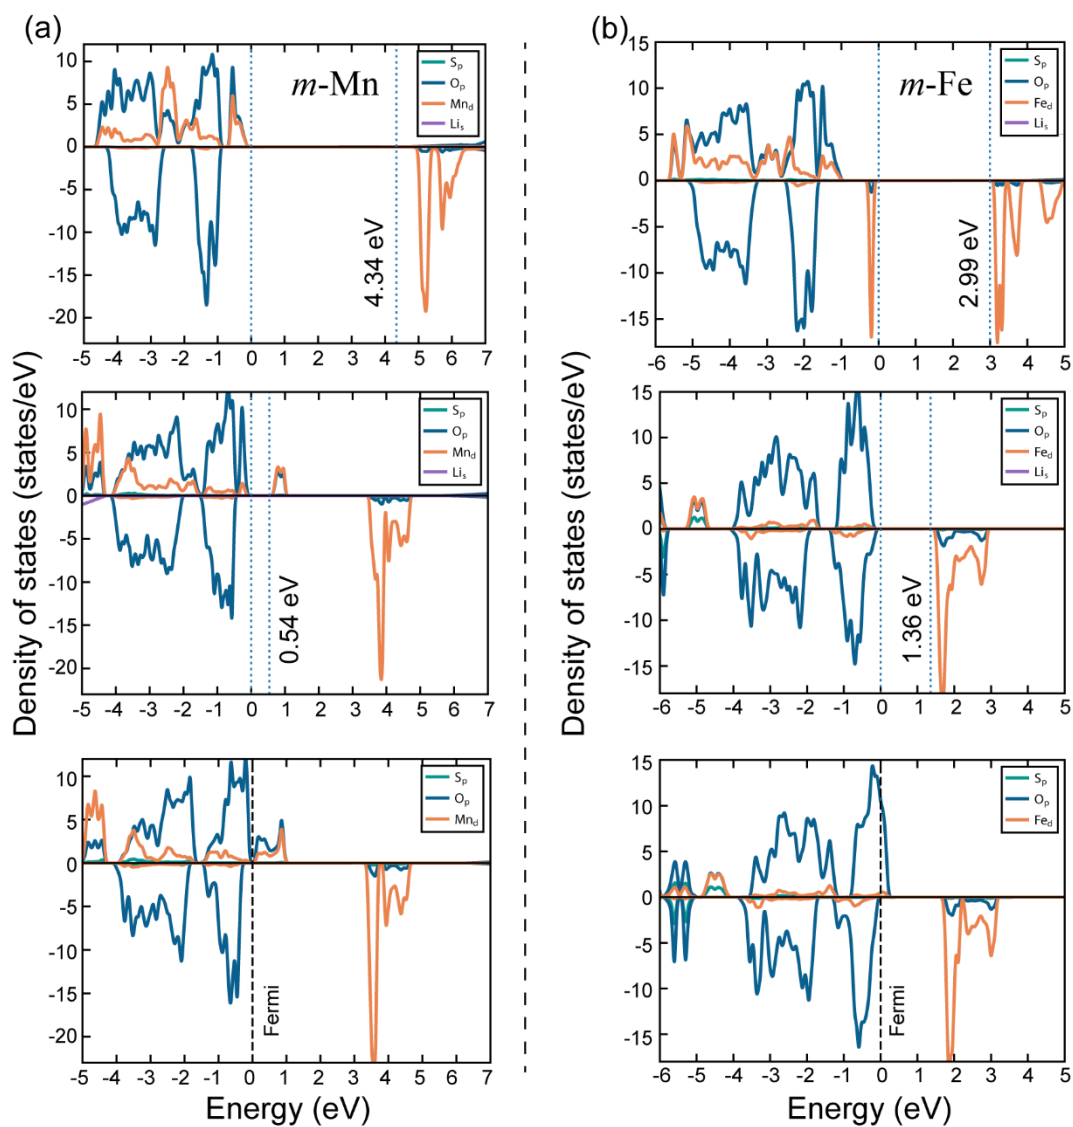

**Figure S6.** Hubbard  $U$  corrected generalized gradient approximation (GGA+ $U$ )-calculated pDOS of (a)  $m\text{-Li}_x\text{Mn}(\text{SO}_4)_2$  and (b)  $m\text{-Li}_x\text{Fe}(\text{SO}_4)_2$ . Top, middle, and bottom panels represent different levels of (de)lithiation, namely,  $x = 2, 1,$  and  $0,$  respectively. Notations on each panel are identical to **Figure S3**.

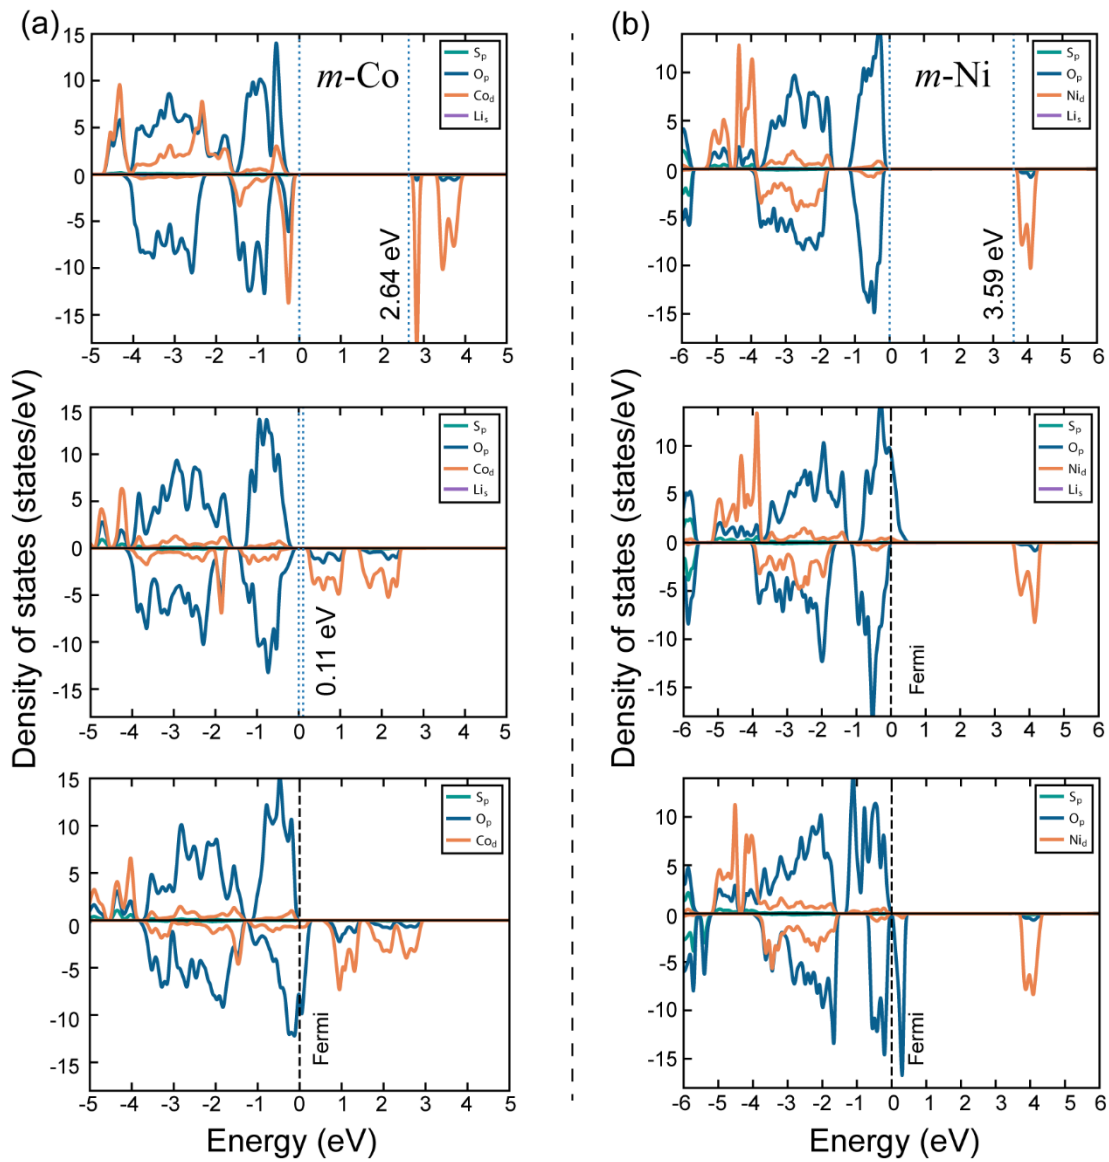

**Figure S7.** GGA+ $U$ -calculated pDOS of (a)  $m\text{-Li}_x\text{Co}(\text{SO}_4)_2$  and (b)  $m\text{-Li}_x\text{Ni}(\text{SO}_4)_2$ . Top, middle, and bottom panels represent different levels of (de)lithiation, namely,  $x = 2, 1,$  and  $0,$  respectively. Notations on each panel are identical to **Figure S3**.

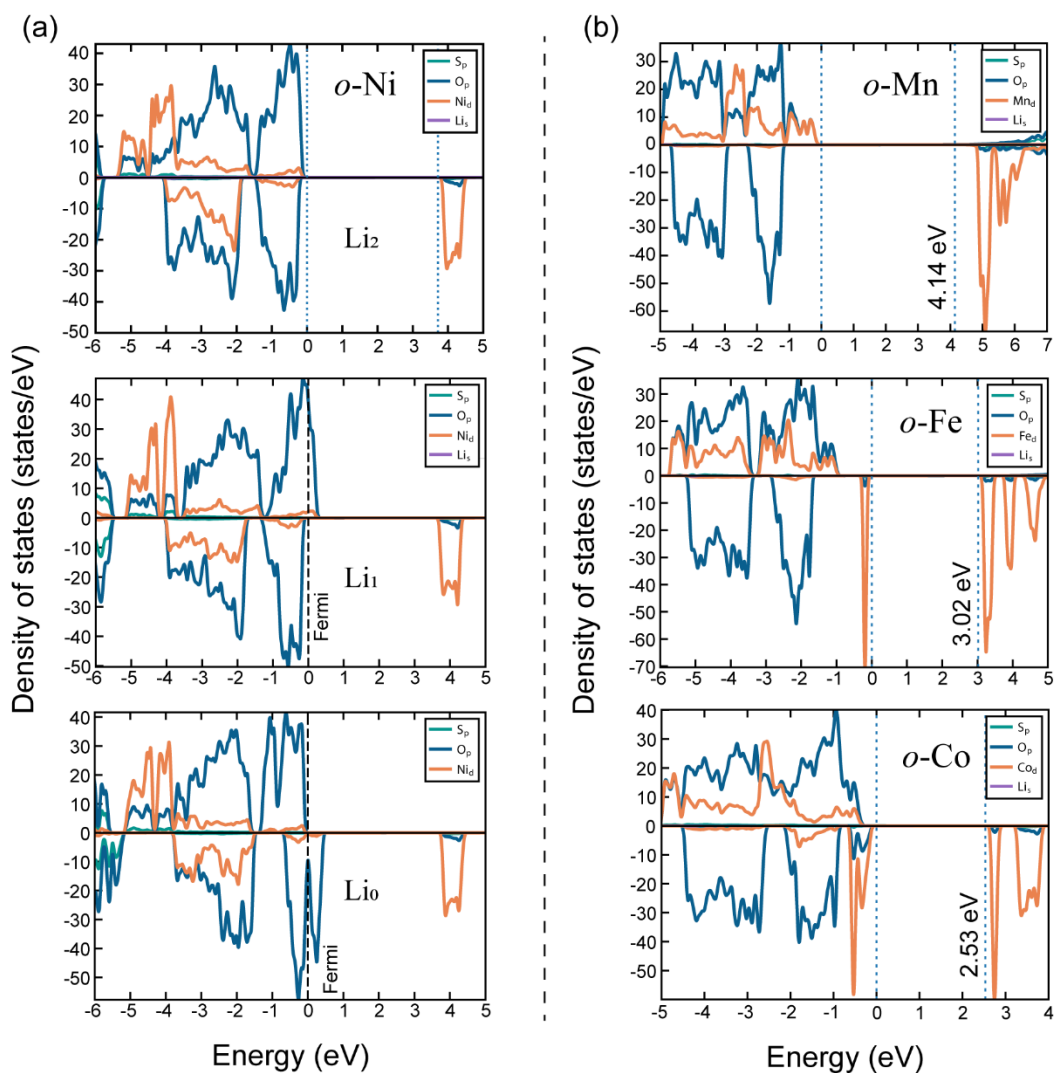

**Figure S8.** GGA+ $U$ -calculated pDOS of (a)  $o\text{-Li}_x\text{Ni}(\text{SO}_4)_2$  and (b)  $o\text{-Li}_2\text{M}(\text{SO}_4)_2$ , where  $M = \text{Mn}$  (top panel),  $\text{Fe}$  (middle), and  $\text{Co}$  (bottom). In (a), the top, middle, and bottom panels represent different levels of (de)lithiation, namely,  $x = 2, 1,$  and  $0$ , respectively. Notations on each panel are identical to **Figure S3**.

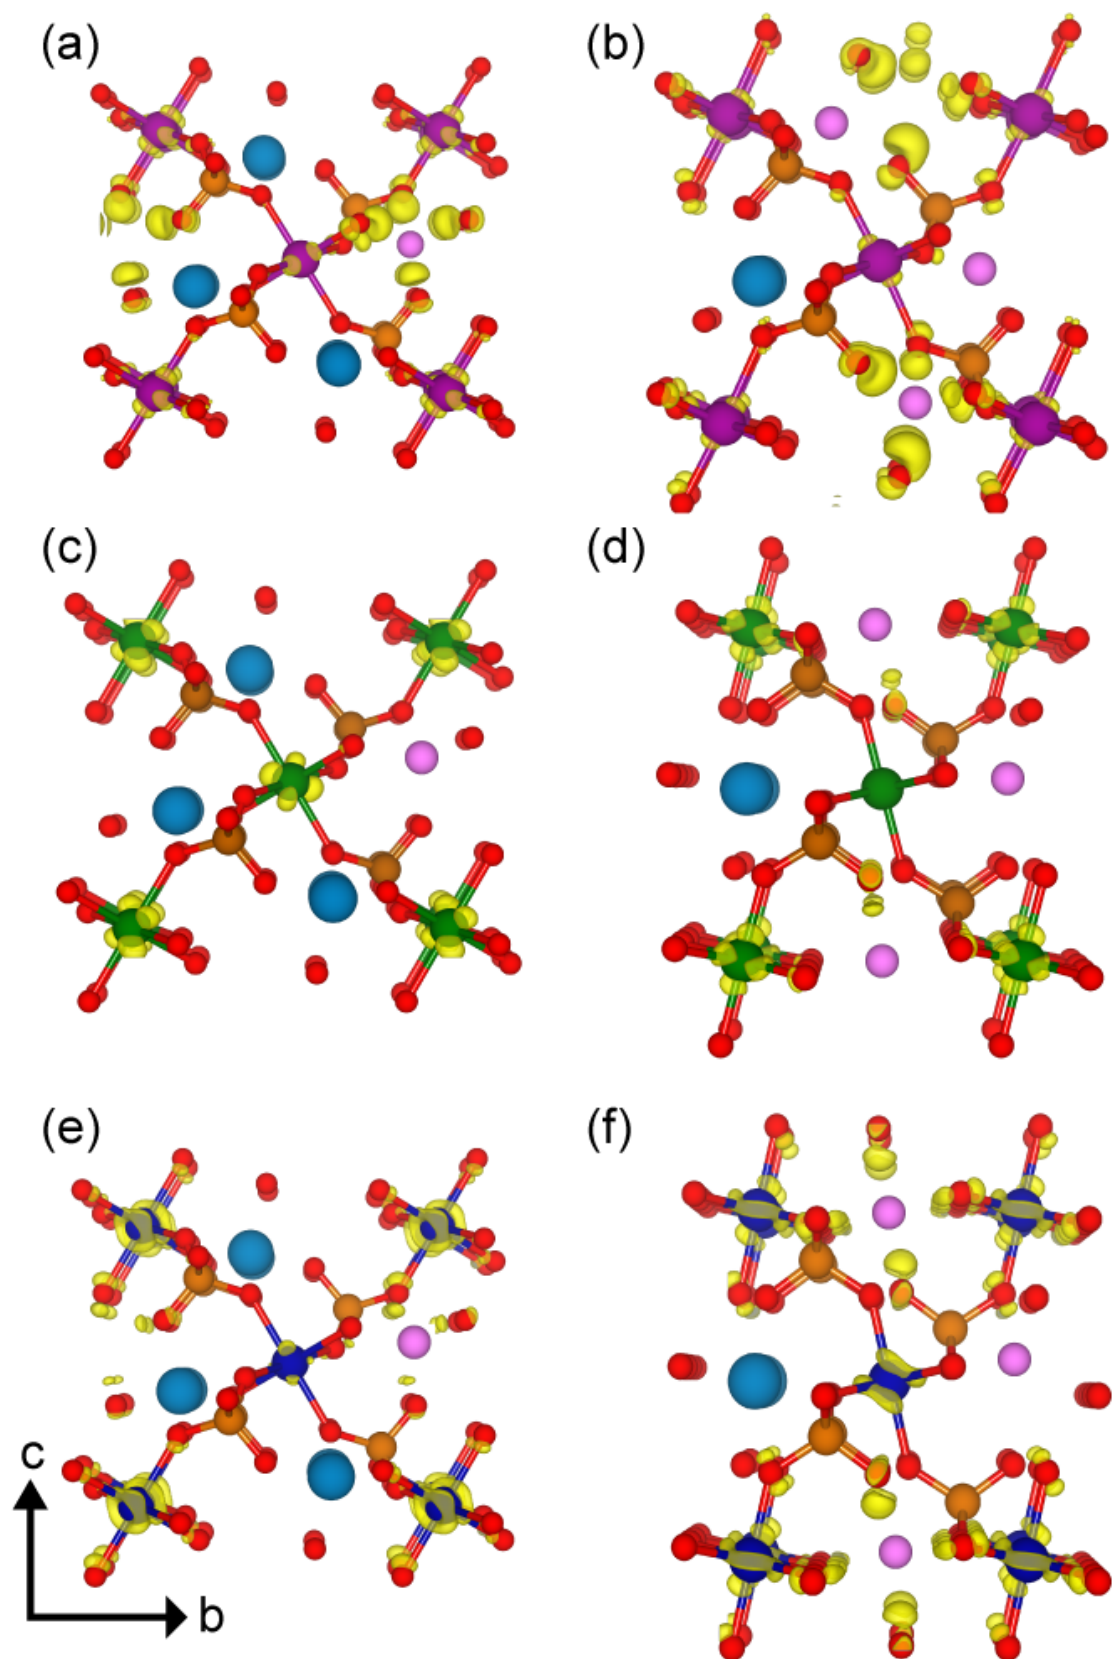

**Figure S9.** Electron density difference for Li-removal in (a)  $\text{Li}_2\text{Mn}(\text{SO}_4)_2$ , (b)  $\text{LiMn}(\text{SO}_4)_2$ , (c)  $\text{Li}_2\text{Fe}(\text{SO}_4)_2$ , (d)  $\text{LiFe}(\text{SO}_4)_2$ , (e)  $\text{Li}_2\text{Co}(\text{SO}_4)_2$ , and (f)  $\text{LiCo}(\text{SO}_4)_2$ . Red, blue, orange, purple, green, dark blue, and pink spheres represent O, Li, S, Mn, Fe, Co, and Li-vacancy, respectively. Isosurfaces are at 0.008 (Mn), 0.02 (Fe), and 0.015  $e^-/\text{bohr}^3$  (Co).

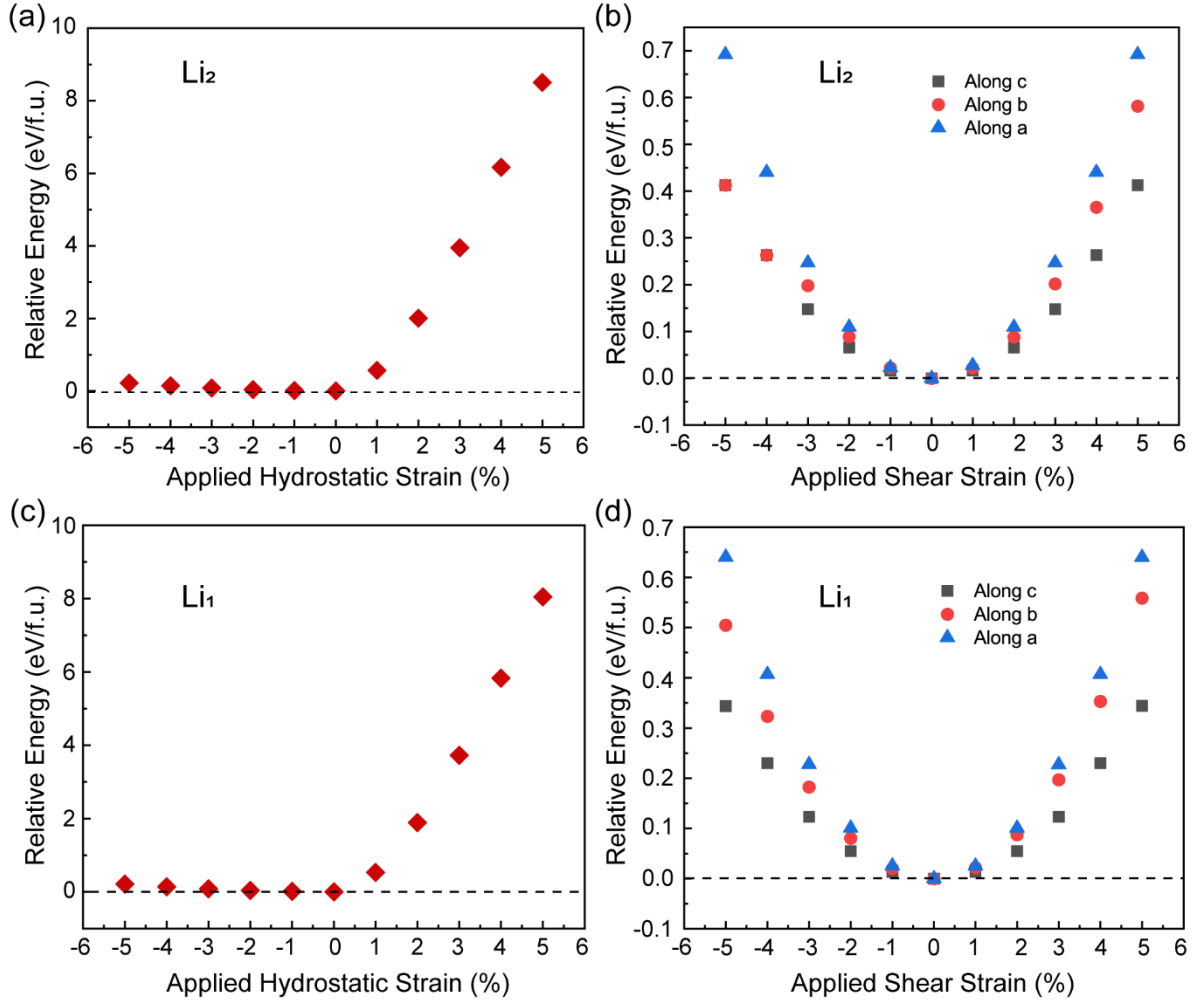

**Figure S10.** SCAN+ $U$  calculated energy, relative to the ground state configuration (in eV/f.u.), as a function of applied hydrostatic strain (panels a and c) and applied shear strain (b and d) in  $m\text{-Li}_2\text{Ni}(\text{SO}_4)_2$  (a and b) and  $\text{LiNi}(\text{SO}_4)_2$  (c and d). Applied strain in both panels are given in %, relative to the ground state configuration. Black squares, red circles, and blue triangles in the right panel indicate shear strains applied along the  $c$ ,  $b$ , and  $a$ -axis of the monoclinic unit cell.



**Table S1.** Optimized lattice parameters of o-Li<sub>2</sub>Ni(SO<sub>4</sub>)<sub>2</sub> (M=Mn, Fe, Co, and Ni) estimated using SCAN+*U* and GGA+*U* approximations, compared with experimental values.

| System                                              |                | a (Å)   | b (Å)   | c (Å)    | α (°)   | β (°)   | γ (°)   | V(Å <sup>3</sup> ) |
|-----------------------------------------------------|----------------|---------|---------|----------|---------|---------|---------|--------------------|
| <b>Li<sub>2</sub>Mn(SO<sub>4</sub>)<sub>2</sub></b> | GGA+ <i>U</i>  | 9.51971 | 9.39573 | 14.03362 | 90.00   | 90.00   | 90.00   | 1255.23138         |
|                                                     | SCAN+ <i>U</i> | 9.34368 | 9.24819 | 13.73874 | 90.00   | 90.00   | 90.00   | 1187.19290         |
| <b>Li<sub>2</sub>Fe(SO<sub>4</sub>)<sub>2</sub></b> | GGA+ <i>U</i>  | 9.38245 | 9.31127 | 13.86869 | 89.9999 | 90.0002 | 89.9999 | 1211.60352         |
|                                                     | SCAN+ <i>U</i> | 9.18221 | 9.17010 | 13.61174 | 90.0001 | 90.0003 | 90.00   | 1146.13246         |
|                                                     | Expt.          | 9.27980 | 9.20890 | 13.67650 | 90.00   | 90.00   | 90.00   | 1168.74938         |
| <b>Li<sub>2</sub>Co(SO<sub>4</sub>)<sub>2</sub></b> | GGA+ <i>U</i>  | 9.31610 | 9.20287 | 13.82582 | 90.00   | 90.00   | 90.00   | 118535436          |
|                                                     | SCAN+ <i>U</i> | 9.16169 | 9.04557 | 13.57579 | 89.9996 | 90.00   | 89.998  | 1125.06175         |
|                                                     | Expt.          | 9.20688 | 9.10175 | 13.71190 | 90.00   | 90.00   | 90.00   | 1149.03965         |
| <b>Li<sub>2</sub>Ni(SO<sub>4</sub>)<sub>2</sub></b> | GGA+ <i>U</i>  | 9.24625 | 9.13135 | 13.70520 | 90.00   | 90.00   | 90.00   | 1157.13982         |
|                                                     | SCAN+ <i>U</i> | 9.09432 | 8.97466 | 13.45300 | 90.0001 | 90.00   | 90.00   | 1098.01195         |
|                                                     | Expt.          | 9.12600 | 9.00100 | 13.54300 | 90.00   | 90.00   | 90.00   | 1112.46447         |

**Table S2.** Calculated and experimental average bond length, Baur's distortion index and bond angle variance of SO<sub>4</sub> and MO<sub>6</sub> polyhedra of m-Li<sub>2</sub>M(SO<sub>4</sub>)<sub>2</sub> (M=Mn, Fe, Co, and Ni).

| System                                              |                | Bond-type | Average Bond Length (Å) | Distortion Index | Bond angle variance (° <sup>2</sup> ) |
|-----------------------------------------------------|----------------|-----------|-------------------------|------------------|---------------------------------------|
| <b>Li<sub>2</sub>Mn(SO<sub>4</sub>)<sub>2</sub></b> | GGA+ <i>U</i>  | Mn-O      | 2.2124                  | 0.02098          | 40.3915                               |
|                                                     |                | S-O       | 1.4898                  | 0.00408          | 3.2049                                |
|                                                     | SCAN+ <i>U</i> | Mn-O      | 2.1750                  | 0.01686          | 40.4581                               |
|                                                     |                | S-O       | 1.4713                  | 0.00420          | 3.1805                                |
|                                                     | Expt.          | Mn-O      | 2.2029                  | 0.01588          | 42.2134                               |
|                                                     |                | S-O       | 1.4566                  | 0.00543          | 4.3430                                |
| <b>Li<sub>2</sub>Fe(SO<sub>4</sub>)<sub>2</sub></b> | GGA+ <i>U</i>  | Fe-O      | 2.1625                  | 0.01649          | 32.8736                               |
|                                                     |                | S-O       | 1.4902                  | 0.00525          | 4.2667                                |
|                                                     | SCAN+ <i>U</i> | Fe-O      | 2.1290                  | 0.01342          | 31.8448                               |
|                                                     |                | S-O       | 1.4717                  | 0.00529          | 3.9191                                |
|                                                     | Expt.          | Fe-O      | 2.1036                  | 0.01179          | 39.7825                               |
|                                                     |                | S-O       | 1.4899                  | 0.04329          | 28.2719                               |
| <b>Li<sub>2</sub>Co(SO<sub>4</sub>)<sub>2</sub></b> | GGA+ <i>U</i>  | Co-O      | 2.1351                  | 0.01336          | 33.2996                               |
|                                                     |                | S-O       | 1.4898                  | 0.00624          | 4.0917                                |
|                                                     | SCAN+ <i>U</i> | Co-O      | 2.1036                  | 0.01024          | 33.5848                               |
|                                                     |                | S-O       | 1.4710                  | 0.00612          | 3.6361                                |
|                                                     | Expt.          | Co-O      | 2.1100                  | 0.00811          | 35.1295                               |
|                                                     |                | S-O       | 1.4773                  | 0.00776          | 3.1783                                |
| <b>Li<sub>2</sub>Ni(SO<sub>4</sub>)<sub>2</sub></b> | GGA+ <i>U</i>  | Ni-O      | 2.1099                  | 0.01630          | 29.5633                               |
|                                                     |                | S-O       | 1.4886                  | 0.00659          | 4.2634                                |
|                                                     | SCAN+ <i>U</i> | Ni-O      | 2.0738                  | 0.01266          | 27.5136                               |
|                                                     |                | S-O       | 1.4707                  | 0.00686          | 3.7888                                |
|                                                     | Expt.          | Ni-O      | 2.1776                  | 0.02216          | 28.0094                               |
|                                                     |                | S-O       | 1.4814                  | 0.01109          | 46.9046                               |

**Table S3.** Calculated and experimental average bond length, Baur's distortion index and bond angle variance of SO<sub>4</sub> and MO<sub>6</sub> polyhedra of o-Li<sub>2</sub>M(SO<sub>4</sub>)<sub>2</sub> (M=Mn, Fe, Co, and Ni).

| System                                            |                | Bond-type | Average Bond Length (Å) | Distortion Index | Bond angle variance (° <sup>2</sup> ) |
|---------------------------------------------------|----------------|-----------|-------------------------|------------------|---------------------------------------|
| Li <sub>2</sub> Mn(SO <sub>4</sub> ) <sub>2</sub> | GGA+ <i>U</i>  | Mn-O      | 2.2010                  | 0.02046          | 20.2946                               |
|                                                   |                | S-O       | 1.4914                  | 0.00369          | 11.2927                               |
|                                                   | SCAN+ <i>U</i> | Mn-O      | 2.1596                  | 0.01774          | 20.7383                               |
|                                                   |                | S-O       | 1.4742                  | 0.00457          | 11.0910                               |
| Li <sub>2</sub> Fe(SO <sub>4</sub> ) <sub>2</sub> | GGA+ <i>U</i>  | Fe-O      | 2.1511                  | 0.01364          | 20.2515                               |
|                                                   |                | S-O       | 1.4912                  | 0.00294          | 11.5389                               |
|                                                   | SCAN+ <i>U</i> | Fe-O      | 2.1120                  | 0.00973          | 23.3890                               |
|                                                   |                | S-O       | 1.4746                  | 0.00502          | 12.7614                               |
|                                                   | Expt.          | Fe-O      | 2.1323                  | 0.01657          | 24.4085                               |
|                                                   |                | S-O       | 1.4929                  | 0.00083          | 17.2093                               |
| Li <sub>2</sub> Co(SO <sub>4</sub> ) <sub>2</sub> | GGA+ <i>U</i>  | Co-O      | 2.1213                  | 0.01813          | 18.03303                              |
|                                                   |                | S-O       | 1.4932                  | 0.00592          | 23.0551                               |
|                                                   | SCAN+ <i>U</i> | Co-O      | 2.0858                  | 0.01697          | 18.4334                               |
|                                                   |                | S-O       | 1.4722                  | 0.00226          | 12.2298                               |
|                                                   | Expt.          | Co-O      | 2.0861                  | 0.01286          | 17.1494                               |
|                                                   |                | S-O       | 1.4831                  | 0.01379          | 12.1005                               |
| Li <sub>2</sub> Ni(SO <sub>4</sub> ) <sub>2</sub> | GGA+ <i>U</i>  | Ni-O      | 2.0922                  | 0.01518          | 15.3757                               |
|                                                   |                | S-O       | 1.4927                  | 0.00613          | 15.3757                               |
|                                                   | SCAN+ <i>U</i> | Ni-O      | 2.0534                  | 0.01051          | 15.8152                               |
|                                                   |                | S-O       | 1.4745                  | 0.00624          | 14.2162                               |
|                                                   | Expt.          | Ni-O      | 2.0584                  | 0.01314          | 15.6537                               |
|                                                   |                | S-O       | 1.4736                  | 0.00563          | 13.0296                               |

**Table S4.** SCAN+*U* predicted on-site, averaged, magnetic moments of transition elements and corresponding electronic configurations.

| System                                            | Magnetic Moment | Corresponding Electronic configuration |
|---------------------------------------------------|-----------------|----------------------------------------|
| Li <sub>2</sub> Mn(SO <sub>4</sub> ) <sub>2</sub> | 4.657           | $t_{2g}^3 e_g^2$                       |
| LiMn(SO <sub>4</sub> ) <sub>2</sub>               | 3.889           | $t_{2g}^3 e_g^1$                       |
| Mn(SO <sub>4</sub> ) <sub>2</sub>                 | 3.033           | $t_{2g}^3 e_g^0$                       |
| Li <sub>2</sub> Fe(SO <sub>4</sub> ) <sub>2</sub> | 3.745           | $t_{2g}^4 e_g^2$                       |
| LiFe(SO <sub>4</sub> ) <sub>2</sub>               | 4.361           | $t_{2g}^3 e_g^2$                       |
| Fe(SO <sub>4</sub> ) <sub>2</sub>                 | 4.301           | $t_{2g}^3 e_g^2$                       |
| Li <sub>2</sub> Co(SO <sub>4</sub> ) <sub>2</sub> | 2.802           | $t_{2g}^5 e_g^2$                       |
| LiCo(SO <sub>4</sub> ) <sub>2</sub>               | 3.224           | $t_{2g}^4 e_g^2$                       |
| Co(SO <sub>4</sub> ) <sub>2</sub>                 | 3.236           | $t_{2g}^4 e_g^2$                       |
| Li <sub>2</sub> Ni(SO <sub>4</sub> ) <sub>2</sub> | 1.785           | $t_{2g}^6 e_g^2$                       |
| LiNi(SO <sub>4</sub> ) <sub>2</sub>               | 1.857           | $t_{2g}^6 e_g^2$                       |
| Ni(SO <sub>4</sub> ) <sub>2</sub>                 | 1.831           | $t_{2g}^6 e_g^2$                       |

**Table S5.** SCAN+*U* predicted change in on-site magnetic moment of individual oxygen ions at various (de)lithiation states of  $\text{Li}_x\text{Ni}(\text{SO}_4)_2$ .

|     | $\text{Li}_2\text{Ni}(\text{SO}_4)_2$ | $\text{LiNi}(\text{SO}_4)_2$ | $\text{Ni}(\text{SO}_4)_2$ |
|-----|---------------------------------------|------------------------------|----------------------------|
| O1  | -0.001                                | 0.053                        | <b>0.520</b>               |
| O2  | -0.001                                | <b>0.324</b>                 | <b>0.519</b>               |
| O3  | -0.001                                | 0.053                        | <b>0.520</b>               |
| O4  | -0.001                                | <b>0.323</b>                 | <b>0.519</b>               |
| O5  | 0.030                                 | 0.051                        | 0.073                      |
| O6  | 0.029                                 | 0.078                        | 0.075                      |
| O7  | 0.029                                 | 0.051                        | 0.073                      |
| O8  | 0.030                                 | 0.078                        | 0.074                      |
| O9  | 0.026                                 | 0.038                        | 0.060                      |
| O10 | 0.025                                 | 0.061                        | 0.059                      |
| O11 | 0.025                                 | 0.038                        | 0.060                      |
| O12 | 0.026                                 | 0.061                        | 0.060                      |
| O13 | 0.029                                 | 0.064                        | <b>0.314</b>               |
| O14 | 0.029                                 | <b>0.349</b>                 | <b>0.314</b>               |
| O15 | 0.029                                 | 0.063                        | <b>0.314</b>               |
| O16 | 0.029                                 | <b>0.349</b>                 | <b>0.314</b>               |

**Table S6.** SCAN+*U* predicted change in on-site magnetic moment of individual oxygen ions at various (de)lithiation states of  $\text{Li}_x\text{Mn}(\text{SO}_4)_2$ .

|     | $\text{Li}_2\text{Mn}(\text{SO}_4)_2$ | $\text{LiMn}(\text{SO}_4)_2$ | $\text{Mn}(\text{SO}_4)_2$ |
|-----|---------------------------------------|------------------------------|----------------------------|
| O1  | 0                                     | 0.001                        | 0.009                      |
| O2  | 0                                     | 0.001                        | 0.008                      |
| O3  | 0                                     | 0.001                        | 0.009                      |
| O4  | 0                                     | 0.001                        | 0.008                      |
| O5  | 0.018                                 | 0.011                        | -0.023                     |
| O6  | 0.018                                 | 0.015                        | -0.025                     |
| O7  | 0.018                                 | 0.011                        | -0.023                     |
| O8  | 0.018                                 | 0.015                        | -0.024                     |
| O9  | 0.017                                 | -0.003                       | -0.015                     |
| O10 | 0.017                                 | -0.005                       | -0.016                     |
| O11 | 0.017                                 | -0.003                       | -0.015                     |
| O12 | 0.017                                 | -0.005                       | -0.016                     |
| O13 | 0.017                                 | -0.021                       | -0.024                     |
| O14 | 0.017                                 | -0.035                       | -0.026                     |
| O15 | 0.017                                 | -0.021                       | -0.024                     |
| O16 | 0.017                                 | -0.034                       | -0.025                     |

**Table S7.** SCAN+*U* predicted change in on-site magnetic moment of individual oxygen ions at various (de)lithiation states of  $\text{Li}_x\text{Co}(\text{SO}_4)_2$ .

|     | $\text{Li}_2\text{Co}(\text{SO}_4)_2$ | $\text{LiCo}(\text{SO}_4)_2$ | $\text{Co}(\text{SO}_4)_2$ |
|-----|---------------------------------------|------------------------------|----------------------------|
| O1  | 0                                     | 0.009                        | 0.276                      |
| O2  | 0                                     | 0.020                        | 0.22                       |
| O3  | 0                                     | 0.009                        | 0.22                       |
| O4  | 0                                     | 0.020                        | 0.276                      |
| O5  | 0.025                                 | 0.081                        | 0.154                      |
| O6  | 0.025                                 | 0.102                        | 0.176                      |
| O7  | 0.025                                 | 0.081                        | 0.176                      |
| O8  | 0.025                                 | 0.102                        | 0.154                      |
| O9  | 0.020                                 | 0.068                        | 0.185                      |
| O10 | 0.019                                 | 0.11                         | 0.176                      |
| O11 | 0.019                                 | 0.068                        | 0.176                      |
| O12 | 0.020                                 | 0.11                         | 0.185                      |
| O13 | 0.023                                 | 0.099                        | 0.192                      |
| O14 | 0.023                                 | 0.184                        | 0.199                      |
| O15 | 0.023                                 | 0.099                        | 0.199                      |
| O16 | 0.023                                 | 0.184                        | 0.192                      |

**Table S8.** SCAN+*U* predicted change in on-site magnetic moment of individual oxygen ions at various (de)lithiation states of  $\text{Li}_x\text{Fe}(\text{SO}_4)_2$ .

|     | $\text{Li}_2\text{Fe}(\text{SO}_4)_2$ | $\text{LiFe}(\text{SO}_4)_2$ | $\text{Fe}(\text{SO}_4)_2$ |
|-----|---------------------------------------|------------------------------|----------------------------|
| O1  | 0                                     | 0.006                        | -0.180                     |
| O2  | 0                                     | 0.006                        | -0.185                     |
| O3  | 0                                     | 0.006                        | -0.180                     |
| O4  | 0                                     | 0.007                        | -0.184                     |
| O5  | 0.021                                 | 0.086                        | 0.006                      |
| O6  | 0.021                                 | 0.085                        | 0.003                      |
| O7  | 0.021                                 | 0.085                        | 0.006                      |
| O8  | 0.021                                 | 0.086                        | 0.002                      |
| O9  | 0.020                                 | 0.078                        | 0.003                      |
| O10 | 0.020                                 | 0.078                        | -0.004                     |
| O11 | 0.020                                 | 0.078                        | 0.003                      |
| O12 | 0.020                                 | 0.079                        | -0.004                     |
| O13 | 0.024                                 | 0.075                        | -0.005                     |
| O14 | 0.024                                 | 0.081                        | -0.003                     |
| O15 | 0.024                                 | 0.076                        | -0.005                     |
| O16 | 0.024                                 | 0.081                        | -0.003                     |

**Table S9.** (a) Mulliken and (b) Löwdin charge populations at various (de)lithiation states of  $m\text{-Li}_x\text{Ni}(\text{SO}_4)_2$ , calculated using LOBSTER package, based on SCAN+ $U$ -computed charge densities.

(a)

| Element | $\text{Li}_2\text{Ni}(\text{SO}_4)_2$ | $\text{LiNi}(\text{SO}_4)_2$ | $\text{Ni}(\text{SO}_4)_2$ |
|---------|---------------------------------------|------------------------------|----------------------------|
| Ni1     | 1.51                                  | 1.58                         | 1.60                       |
| Ni2     | 1.51                                  | 1.58                         | 1.60                       |
| O1      | -1.14                                 | -1.06                        | -0.67                      |
| O2      | -1.14                                 | -0.87                        | -0.67                      |
| O3      | -1.14                                 | -1.06                        | -0.67                      |
| O4      | -1.14                                 | -0.87                        | -0.67                      |
| O5      | -1.08                                 | -1.07                        | -1.03                      |
| O6      | -1.08                                 | -1.02                        | -1.03                      |
| O7      | -1.08                                 | -1.07                        | -1.03                      |
| O8      | -1.08                                 | -1.02                        | -1.03                      |
| O9      | -1.11                                 | -1.11                        | -1.06                      |
| O10     | -1.11                                 | -1.05                        | -1.06                      |
| O11     | -1.11                                 | -1.11                        | -1.06                      |
| O12     | -1.11                                 | -1.05                        | -1.06                      |
| O13     | -1.10                                 | -1.09                        | -0.91                      |
| O14     | -1.10                                 | -0.86                        | -0.90                      |
| O15     | -1.10                                 | -1.09                        | -0.91                      |
| O16     | -1.10                                 | -0.86                        | -0.90                      |

(b)

| Element | $\text{Li}_2\text{Ni}(\text{SO}_4)_2$ | $\text{LiNi}(\text{SO}_4)_2$ | $\text{Ni}(\text{SO}_4)_2$ |
|---------|---------------------------------------|------------------------------|----------------------------|
| Ni1     | 1.39                                  | 1.44                         | 1.42                       |
| Ni2     | 1.39                                  | 1.44                         | 1.42                       |
| O1      | -1.03                                 | -0.97                        | -0.62                      |
| O2      | -1.03                                 | -0.78                        | -0.62                      |
| O3      | -1.03                                 | -0.97                        | -0.62                      |
| O4      | -1.03                                 | -0.78                        | -0.62                      |
| O5      | -1.00                                 | -0.99                        | -0.94                      |
| O6      | -1.00                                 | -0.93                        | -0.95                      |
| O7      | -1.00                                 | -0.99                        | -0.94                      |
| O8      | -1.00                                 | -0.93                        | -0.95                      |
| O9      | -1.02                                 | -1.02                        | -0.97                      |
| O10     | -1.02                                 | -0.96                        | -0.97                      |
| O11     | -1.02                                 | -1.02                        | -0.97                      |
| O12     | -1.02                                 | -0.96                        | -0.97                      |
| O13     | -1.01                                 | -1.00                        | -0.83                      |
| O14     | -1.01                                 | -0.78                        | -0.83                      |
| O15     | -1.01                                 | -1.00                        | -0.83                      |
| O16     | -1.01                                 | -0.78                        | -0.83                      |

**Table S10.** Mulliken charge population at various (de)lithiation states of  $m\text{-Li}_x\text{Mn}(\text{SO}_4)_2$  calculated using LOBSTER package, based on SCAN+ $U$ -computed charge densities.

| Element | $\text{Li}_2\text{Mn}(\text{SO}_4)_2$ | $\text{LiMn}(\text{SO}_4)_2$ | $\text{Mn}(\text{SO}_4)_2$ |
|---------|---------------------------------------|------------------------------|----------------------------|
| Mn1     | 1.61                                  | 1.92                         | 2.05                       |
| Mn2     | 1.61                                  | 1.92                         | 2.05                       |
| O1      | -1.14                                 | -1.07                        | -0.97                      |
| O2      | -1.14                                 | -1.07                        | -0.97                      |
| O3      | -1.14                                 | -1.07                        | -0.97                      |
| O4      | -1.14                                 | -1.07                        | -0.97                      |
| O5      | -1.10                                 | -1.06                        | -0.95                      |
| O6      | -1.10                                 | -1.05                        | -0.94                      |
| O7      | -1.10                                 | -1.06                        | -0.95                      |
| O8      | -1.10                                 | -1.05                        | -0.94                      |
| O9      | -1.11                                 | -1.08                        | -0.96                      |
| O10     | -1.11                                 | -1.03                        | -0.97                      |
| O11     | -1.11                                 | -1.08                        | -0.96                      |
| O12     | -1.11                                 | -1.03                        | -0.97                      |
| O13     | -1.10                                 | -1.05                        | -0.94                      |
| O14     | -1.10                                 | -0.99                        | -0.94                      |
| O15     | -1.10                                 | -0.105                       | -0.94                      |
| O16     | -1.10                                 | -0.99                        | -0.94                      |

**Table S11.** Mulliken charge population at various (de)lithiation states of  $m\text{-Li}_x\text{Fe}(\text{SO}_4)_2$  calculated using LOBSTER package, based on SCAN+ $U$ -computed charge densities.

| Element | $\text{Li}_2\text{Fe}(\text{SO}_4)_2$ | $\text{LiFe}(\text{SO}_4)_2$ | $\text{Fe}(\text{SO}_4)_2$ |
|---------|---------------------------------------|------------------------------|----------------------------|
| Fe1     | 1.58                                  | 2.09                         | 2.14                       |
| Fe2     | 1.58                                  | 2.09                         | 2.14                       |
| O1      | -1.14                                 | -1.08                        | -0.89                      |
| O2      | -1.14                                 | -1.08                        | -0.88                      |
| O3      | -1.14                                 | -1.08                        | -0.89                      |
| O4      | -1.14                                 | -1.08                        | -0.88                      |
| O5      | -1.09                                 | -1.06                        | -1.01                      |
| O6      | -1.09                                 | -1.06                        | -1.01                      |
| O7      | -1.09                                 | -1.06                        | -1.01                      |
| O8      | -1.09                                 | -1.06                        | -1.01                      |
| O9      | -1.11                                 | -1.08                        | -1.02                      |
| O10     | -1.11                                 | -1.07                        | -1.02                      |
| O11     | -1.11                                 | -1.08                        | -1.02                      |
| O12     | -1.11                                 | -1.07                        | -1.02                      |
| O13     | -1.11                                 | -1.07                        | -1.01                      |
| O14     | -1.11                                 | -1.08                        | -1.01                      |
| O15     | -1.11                                 | -1.07                        | -1.01                      |
| O16     | -1.11                                 | -1.08                        | -1.01                      |

**Table S12.** Mulliken charge population at various (de)lithiation states of  $m\text{-Li}_2\text{Co}(\text{SO}_4)_2$  calculated using LOBSTER package, based on SCAN+ $U$ -computed charge densities.

| Element | $\text{Li}_2\text{Co}(\text{SO}_4)_2$ | $\text{LiCo}(\text{SO}_4)_2$ | $\text{Co}(\text{SO}_4)_2$ |
|---------|---------------------------------------|------------------------------|----------------------------|
| Co1     | 1.57                                  | 1.90                         | 1.97                       |
| Co2     | 1.57                                  | 1.90                         | 1.97                       |
| O1      | -1.14                                 | -1.07                        | -0.76                      |
| O2      | -1.14                                 | -1.07                        | -0.80                      |
| O3      | -1.14                                 | -1.07                        | -0.80                      |
| O4      | -1.14                                 | -1.07                        | -0.76                      |
| O5      | -1.09                                 | -1.02                        | -0.92                      |
| O6      | -1.09                                 | -1.02                        | -0.91                      |
| O7      | -1.09                                 | -1.02                        | -0.91                      |
| O8      | -1.09                                 | -1.02                        | -0.92                      |
| O9      | -1.11                                 | -1.05                        | -0.92                      |
| O10     | -1.11                                 | -1.05                        | -0.93                      |
| O11     | -1.11                                 | -1.05                        | -0.93                      |
| O12     | -1.11                                 | -1.05                        | -0.92                      |
| O13     | -1.11                                 | -1.05                        | -0.90                      |
| O14     | -1.11                                 | -1.05                        | -0.90                      |
| O15     | -1.11                                 | -1.05                        | -0.90                      |
| O16     | -1.11                                 | -1.05                        | -0.90                      |

**Table S13.** SCAN+*U*-calculated S-O and M-O bond lengths at various (de)lithiation states for *m*-Li<sub>*x*</sub>M(SO<sub>4</sub>)<sub>2</sub> (M = Ni, Mn, Fe and Co).

| Li <sub>2</sub> Ni(SO <sub>4</sub> ) <sub>2</sub> | LiNi(SO <sub>4</sub> ) <sub>2</sub> | Ni(SO <sub>4</sub> ) <sub>2</sub> |
|---------------------------------------------------|-------------------------------------|-----------------------------------|
| (Ni1-O6) = 2.12365 Å                              | (Ni1-O6) = 2.11576 Å                | (Ni1-O6) = 2.03590 Å              |
| (Ni1-O11) = 2.03924 Å                             | (Ni1-O11) = 2.05477 Å               | (Ni1-O11) = 2.03518 Å             |
| (Ni1-O16) = 2.06790 Å                             | (Ni1-O16) = 1.99274 Å               | (Ni1-O16) = 2.02626 Å             |
| (Ni1-O15) = 2.07702 Å                             | (Ni1-O15) = 2.04683 Å               | (Ni1-O15) = 2.03603 Å             |
| (Ni1-O12) = 2.03538 Å                             | (Ni1-O12) = 2.03403 Å               | (Ni1-O12) = 2.03341 Å             |
| (Ni1-O5) = 2.09935 Å                              | (Ni1-O5) = 2.04563 Å                | (Ni1-O5) = 2.03062 Å              |
| (Ni2-O13) = 2.06790 Å                             | (Ni2-O13) = 2.04667 Å               | (Ni2-O13) = 2.03546 Å             |
| (Ni2-O7) = 2.12364 Å                              | (Ni2-O7) = 2.04545 Å                | (Ni2-O7) = 2.03094 Å              |
| (Ni2-O10) = 2.03922 Å                             | (Ni2-O10) = 2.03440 Å               | (Ni2-O10) = 2.03375 Å             |
| (Ni2-O9) = 2.03538 Å                              | (Ni2-O9) = 2.05459 Å                | (Ni2-O9) = 2.03502 Å              |
| (Ni2-O8) = 2.09936 Å                              | (Ni2-O8) = 2.11490 Å                | (Ni2-O8) = 2.03557 Å              |
| (Ni2-O14) = 2.07705 Å                             | (Ni2-O14) = 1.99412 Å               | (Ni2-O14) = 2.02644 Å             |

| Li <sub>2</sub> Ni(SO <sub>4</sub> ) <sub>2</sub> | LiNi(SO <sub>4</sub> ) <sub>2</sub> | Ni(SO <sub>4</sub> ) <sub>2</sub> |
|---------------------------------------------------|-------------------------------------|-----------------------------------|
| (S1-O5) = 1.48130(0) Å                            | (S1-O5) = 1.48377 Å                 | (S1-O5) = 1.44933 Å               |
| (S1-O1) = 1.44990(0) Å                            | (S1-O1) = 1.43421 Å                 | (S1-O1) = 1.49229 Å               |
| (S1-O9) = 1.47531(0) Å                            | (S1-O9) = 1.48185 Å                 | (S1-O9) = 1.44386 Å               |
| (S1-O13) = 1.47506(0) Å                           | (S1-O13) = 1.48163 Å                | (S1-O13) = 1.48141 Å              |
| (S2-O14) = 1.47518(0) Å                           | (S2-O14) = 1.50160 Å                | (S2-O14) = 1.48176 Å              |
| (S2-O10) = 1.47631(0) Å                           | (S2-O10) = 1.44639 Å                | (S2-O10) = 1.44401 Å              |
| (S2-O2) = 1.45054(0) Å                            | (S2-O2) = 1.47039 Å                 | (S2-O2) = 1.49205 Å               |
| (S2-O6) = 1.48086(0) Å                            | (S2-O6) = 1.45015 Å                 | (S2-O6) = 1.44891 Å               |
| (S3-O15) = 1.47518(0) Å                           | (S3-O15) = 1.48162 Å                | (S3-O15) = 1.48140 Å              |
| (S3-O7) = 1.48086(0) Å                            | (S3-O7) = 1.48372 Å                 | (S3-O7) = 1.44932 Å               |
| (S3-O11) = 1.47630(0) Å                           | (S3-O11) = 1.48187 Å                | (S3-O11) = 1.44394 Å              |
| (S3-O3) = 1.45054(0) Å                            | (S3-O3) = 1.43413 Å                 | (S3-O3) = 1.49232 Å               |
| (S4-O4) = 1.44992(0) Å                            | (S4-O4) = 1.47011 Å                 | (S4-O4) = 1.49202 Å               |
| (S4-O12) = 1.47530(0) Å                           | (S4-O12) = 1.44643 Å                | (S4-O12) = 1.44413 Å              |
| (S4-O8) = 1.48129(0) Å                            | (S4-O8) = 1.45027 Å                 | (S4-O8) = 1.44879 Å               |
| (S4-O16) = 1.47503(0) Å                           | (S4-O16) = 1.50196 Å                | (S4-O16) = 1.48170 Å              |

| Li <sub>2</sub> Mn(SO <sub>4</sub> ) <sub>2</sub> | LiMn(SO <sub>4</sub> ) <sub>2</sub> | Mn(SO <sub>4</sub> ) <sub>2</sub> |
|---------------------------------------------------|-------------------------------------|-----------------------------------|
| (Mn1-O6) = 2.18736 Å                              | (Mn1-O6) = 2.17687 Å                | (Mn1-O6) = 1.91301 Å              |
| (Mn1-O11) = 2.12220 Å                             | (Mn1-O11) = 1.97186 Å               | (Mn1-O11) = 1.90916 Å             |
| (Mn1-O16) = 2.22025 Å                             | (Mn1-O16) = 1.90674 Å               | (Mn1-O16) = 1.90003 Å             |
| (Mn1-O15) = 2.22014 Å                             | (Mn1-O15) = 1.98723 Å               | (Mn1-O15) = 1.90020 Å             |
| (Mn1-O12) = 2.12210 Å                             | (Mn1-O12) = 1.92036 Å               | (Mn1-O12) = 1.91823 Å             |
| (Mn1-O5) = 2.18763 Å                              | (Mn1-O5) = 2.30486 Å                | (Mn1-O5) = 1.91517 Å              |
| (Mn2-O13) = 2.22025 Å                             | (Mn2-O13) = 1.98704 Å               | (Mn2-O13) = 1.89995 Å             |
| (Mn2-O7) = 2.18736 Å                              | (Mn2-O7) = 2.30458 Å                | (Mn2-O7) = 1.91544 Å              |
| (Mn2-O10) = 2.12220 Å                             | (Mn2-O10) = 1.92135 Å               | (Mn2-O10) = 1.91799 Å             |
| (Mn2-O9) = 2.12210 Å                              | (Mn2-O9) = 1.97243 Å                | (Mn2-O9) = 1.90963 Å              |
| (Mn2-O8) = 2.18765 Å                              | (Mn2-O8) = 2.17668 Å                | (Mn2-O8) = 1.91274 Å              |
| (Mn2-O14) = 2.22014 Å                             | (Mn2-O14) = 1.90618 Å               | (Mn2-O14) = 1.90043 Å             |



| $\text{Li}_2\text{Mn}(\text{SO}_4)_2$ | $\text{LiMn}(\text{SO}_4)_2$ | $\text{Mn}(\text{SO}_4)_2$ |
|---------------------------------------|------------------------------|----------------------------|
| (S1-O5) = 1.48012 Å                   | (S1-O5) = 1.46125 Å          | (S1-O5) = 1.49804 Å        |
| (S1-O1) = 1.45904 Å                   | (S1-O1) = 1.41929 Å          | (S1-O1) = 1.40121 Å        |
| (S1-O9) = 1.47288 Å                   | (S1-O9) = 1.50712 Å          | (S1-O9) = 1.50762 Å        |
| (S1-O13) = 1.47374 Å                  | (S1-O13) = 1.50285 Å         | (S1-O13) = 1.50113 Å       |
| (S2-O14) = 1.47375 Å                  | (S2-O14) = 1.50770 Å         | (S2-O14) = 1.50201 Å       |
| (S2-O10) = 1.47285 Å                  | (S2-O10) = 1.49699 Å         | (S2-O10) = 1.50613 Å       |
| (S2-O2) = 1.45904 Å                   | (S2-O2) = 1.43209 Å          | (S2-O2) = 1.40126 Å        |
| (S2-O6) = 1.48013 Å                   | (S2-O6) = 1.45237 Å          | (S2-O6) = 1.49914 Å        |
| (S3-O15) = 1.47376 Å                  | (S3-O15) = 1.50279 Å         | (S3-O15) = 1.50137 Å       |
| (S3-O7) = 1.48015 Å                   | (S3-O7) = 1.46124 Å          | (S3-O7) = 1.49814 Å        |
| (S3-O11) = 1.47287 Å                  | (S3-O3) = 1.41928 Å          | (S3-O11) = 1.50798 Å       |
| (S3-O3) = 1.45897 Å                   | (S3-O11) = 1.50721 Å         | (S3-O3) = 1.40121 Å        |
| (S4-O4) = 1.45899 Å                   | (S4-O4) = 1.43213 Å          | (S4-O4) = 1.40130 Å        |
| (S4-O12) = 1.47290 Å                  | (S4-O12) = 1.49714 Å         | (S4-O12) = 1.50599 Å       |
| (S4-O8) = 1.48013 Å                   | (S4-O8) = 1.45236 Å          | (S4-O8) = 1.49912 Å        |
| (S4-O16) = 1.47375 Å                  | (S4-O16) = 1.50749 Å         | (S4-O16) = 1.50203 Å       |

| $\text{Li}_2\text{Fe}(\text{SO}_4)_2$ | $\text{LiFe}(\text{SO}_4)_2$ | $\text{Fe}(\text{SO}_4)_2$ |
|---------------------------------------|------------------------------|----------------------------|
| (Fe1-O6) = 2.17040 Å                  | (Fe1-O6) = 1.99780 Å         | (Fe1-O6) = 1.98399 Å       |
| (Fe1-O11) = 2.10094 Å                 | l(Fe1-O11) = 2.03597 Å       | (Fe1-O11) = 1.98263 Å      |
| (Fe1-O16) = 2.11517 Å                 | l(Fe1-O16) = 2.02310 Å       | (Fe1-O16) = 1.98201 Å      |
| (Fe1-O15) = 2.11858 Å                 | l(Fe1-O15) = 2.04369 Å       | (Fe1-O15) = 1.98580 Å      |
| (Fe1-O12) = 2.09559 Å                 | l(Fe1-O12) = 2.03401 Å       | (Fe1-O12) = 1.99253 Å      |
| (Fe1-O5) = 2.17334 Å                  | l(Fe1-O5) = 1.98894 Å        | (Fe1-O5) = 1.97956 Å       |
| (Fe2-O13) = 2.11517 Å                 | (Fe2-O13) = 2.04524 Å        | (Fe2-O13) = 1.98595 Å      |
| (Fe2-O7) = 2.17054 Å                  | (Fe2-O7) = 1.99311 Å         | (Fe2-O7) = 1.97946 Å       |
| (Fe2-O10) = 2.10104 Å                 | (Fe2-O10) = 2.03242 Å        | (Fe2-O10) = 1.99247 Å      |
| (Fe2-O9) = 2.09559 Å                  | (Fe2-O9) = 2.03567 Å         | (Fe2-O9) = 1.98282 Å       |
| (Fe2-O8) = 2.17354 Å                  | (Fe2-O8) = 1.99551 Å         | (Fe2-O8) = 1.98407 Å       |
| (Fe2-O14) = 2.11824 Å                 | (Fe2-O14) = 2.02075 Å        | (Fe2-O14) = 1.98197 Å      |

| $\text{Li}_2\text{Fe}(\text{SO}_4)_2$ | $\text{LiFe}(\text{SO}_4)_2$ | $\text{Fe}(\text{SO}_4)_2$ |
|---------------------------------------|------------------------------|----------------------------|
| (S1-O5) = 1.47663 Å                   | (S1-O5) = 1.47288 Å          | l(S1-O5) = 1.47878 Å       |
| (S1-O1) = 1.45590 Å                   | (S1-O9) = 1.49002 Å          | l(S1-O9) = 1.48012 Å       |
| (S1-O9) = 1.47299 Å                   | (S1-O1) = 1.42655 Å          | l(S1-O1) = 1.43542 Å       |
| (S1-O13) = 1.48077 Å                  | (S1-O13) = 1.49631 Å         | l(S1-O13) = 1.47920 Å      |
| (S2-O14) = 1.48077 Å                  | (S2-O14) = 1.49091 Å         | (S2-O14) = 1.48023 Å       |
| (S2-O10) = 1.47266 Å                  | (S2-O2) = 1.42697 Å          | (S2-O2) = 1.43606 Å        |
| (S2-O2) = 1.45608 Å                   | (S2-O10) = 1.49730 Å         | (S2-O10) = 1.47905 Å       |
| (S2-O6) = 1.47713 Å                   | (S2-O6) = 1.47106 Å          | (S2-O6) = 1.47835 Å        |
| (S3-O15) = 1.48071 Å                  | (S3-O15) = 1.49504 Å         | (S3-O15) = 1.47921 Å       |
| (S3-O7) = 1.47711 Å                   | (S3-O7) = 1.47206 Å          | (S3-O7) = 1.47865 Å        |
| (S3-O11) = 1.47266 Å                  | (S3-O11) = 1.49226 Å         | (S3-O11) = 1.48008 Å       |
| (S3-O3) = 1.45613 Å                   | (S3-O3) = 1.42691 Å          | (S3-O3) = 1.43557 Å        |
| (S4-O4) = 1.45597 Å                   | (S4-O4) = 1.42707 Å          | (S4-O4) = 1.43588 Å        |
| (S4-O12) = 1.47296 Å                  | (S4-O12) = 1.49524 Å         | (S4-O12) = 1.47889 Å       |
| (S4-O8) = 1.47658 Å                   | (S4-O8) = 1.47191 Å          | (S4-O8) = 1.47850 Å        |
| (S4-O16) = 1.48077 Å                  | (S4-O16) = 1.49293 Å         | (S4-O16) = 1.48026 Å       |

| $\text{Li}_2\text{Co}(\text{SO}_4)_2$ | $\text{LiCo}(\text{SO}_4)_2$ | $\text{Co}(\text{SO}_4)_2$ |
|---------------------------------------|------------------------------|----------------------------|
| (Co1-O6) = 2.12335 Å                  | (Co1-O6) = 2.05906 Å         | (Co1-O6) = 2.00399 Å       |
| (Co1-O11) = 2.07338 Å                 | (Co1-O11) = 2.06748 Å        | (Co1-O11) = 1.99577 Å      |
| (Co1-O16) = 2.11503 Å                 | (Co1-O16) = 1.87982 Å        | (Co1-O16) = 1.92431 Å      |
| (Co1-O15) = 2.11641 Å                 | (Co1-O15) = 1.99580 Å        | (Co1-O15) = 1.90834 Å      |
| (Co1-O12) = 2.06921 Å                 | (Co1-O12) = 1.95123 Å        | (Co1-O12) = 2.00657 Å      |
| (Co1-O5) = 2.12421 Å                  | (Co1-O5) = 2.08089 Å         | (Co1-O5) = 2.00595 Å       |
| (Co2-O13) = 2.11504 Å                 | (Co2-O13) = 1.99526 Å        | (Co2-O13) = 1.92429 Å      |
| (Co2-O7) = 2.12335 Å                  | (Co2-O7) = 2.08059 Å         | (Co2-O7) = 2.00396 Å       |
| (Co2-O10) = 2.07339 Å                 | (Co2-O10) = 1.95141 Å        | (Co2-O10) = 1.99584 Å      |
| (Co2-O9) = 2.06921 Å                  | (Co2-O9) = 2.06788 Å         | (Co2-O9) = 2.00661 Å       |
| (Co2-O8) = 2.12420 Å                  | (Co2-O8) = 2.05876 Å         | (Co2-O8) = 2.00599 Å       |
| (Co2-O14) = 2.11642 Å                 | (Co2-O14) = 1.87980 Å        | (Co2-O14) = 1.90832 Å      |

| $\text{Li}_2\text{Co}(\text{SO}_4)_2$ | $\text{LiCo}(\text{SO}_4)_2$ | $\text{Co}(\text{SO}_4)_2$ |
|---------------------------------------|------------------------------|----------------------------|
| (S1-O5) = 1.48201 Å                   | (S1-O5) = 1.47676(0) Å       | (S1-O5) = 1.46576 Å        |
| (S1-O1) = 1.45300 Å                   | (S1-O1) = 1.41797(0) Å       | (S1-O9) = 1.47448 Å        |
| (S1-O9) = 1.47362 Å                   | (S1-O9) = 1.49453(0) Å       | (S1-O1) = 1.44833 Å        |
| (S1-O13) = 1.47535 Å                  | (S1-O13) = 1.49647(0) Å      | (S1-O13) = 1.48578 Å       |
| (S2-O14) = 1.47538 Å                  | (S2-O14) = 1.50678(0) Å      | (S2-O14) = 1.49110 Å       |
| (S2-O10) = 1.47350 Å                  | (S2-O2) = 1.43067(0) Å       | (S2-O2) = 1.43831 Å        |
| (S2-O2) = 1.45310 Å                   | (S2-O6) = 1.46841(0) Å       | (S2-O10) = 1.47569 Å       |
| (S2-O6) = 1.48221 Å                   | (S2-O10) = 1.47793(0) Å      | (S2-O6) = 1.47211 Å        |
| (S3-O15) = 1.47538 Å                  | (S3-O15) = 1.49652(0) Å      | (S3-O15) = 1.49121 Å       |
| (S3-O7) = 1.48221 Å                   | (S3-O7) = 1.47681(0) Å       | (S3-O7) = 1.47211 Å        |
| (S3-O11) = 1.47350 Å                  | (S3-O11) = 1.49461(0) Å      | (S3-O11) = 1.47585 Å       |
| (S3-O3) = 1.45310 Å                   | (S3-O3) = 1.41794(0) Å       | (S3-O3) = 1.43838 Å        |
| (S4-O4) = 1.45301 Å                   | (S4-O4) = 1.43063(0) Å       | (S4-O4) = 1.44849 Å        |
| (S4-O12) = 1.47361 Å                  | (S4-O12) = 1.47802(0) Å      | (S4-O12) = 1.47458 Å       |
| (S4-O8) = 1.48202 Å                   | (S4-O8) = 1.46844(0) Å       | (S4-O8) = 1.46577 Å        |
| (S4-O16) = 1.47535 Å                  | (S4-O16) = 1.50675(0) Å      | (S4-O16) = 1.48560 Å       |
